# Supplementary material
Source: Springer Nature journal article supplement (https://www.springermedizin.de/resource/supplementary/12885_2014_4646_MOESM2_ESM.pdf/9466838)
Supplement: MOESM2 [file 9466838]

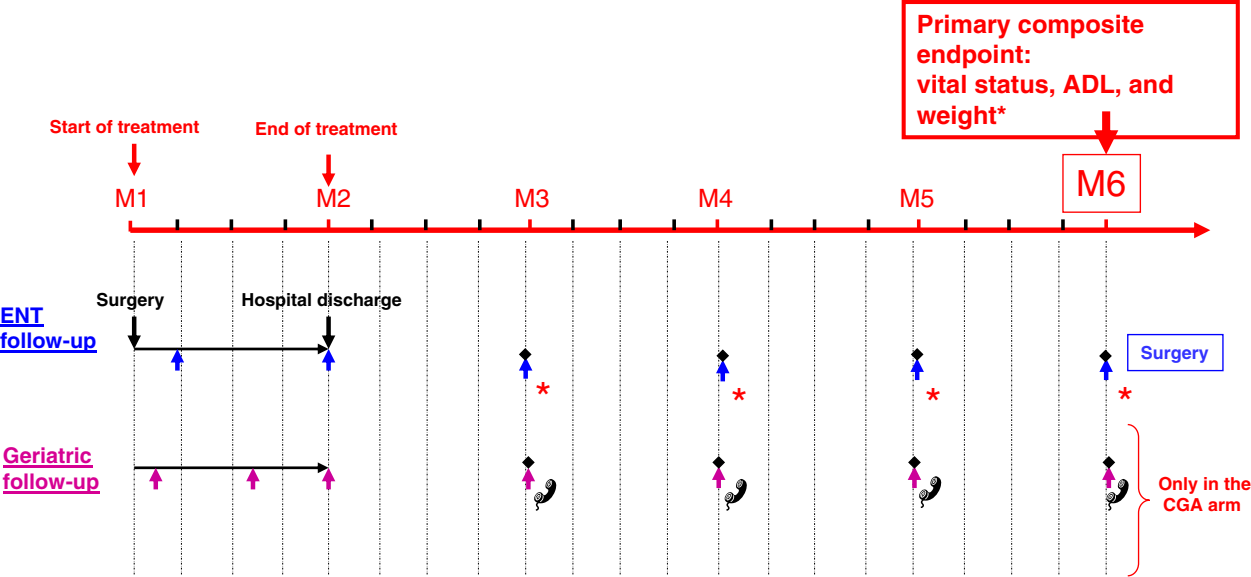

\*Data to be collected by the clinical research assistant independently from the ENT healthcare professionals and geriatrician in charge of the patient
